# Supplementary material for: In silico and in vitro identification of secoisolariciresinol as a re-sensitizer of P-glycoprotein-dependent doxorubicin-resistance NCI/ADR-RES cancer cells
Source: PubMed Central journal article supplement (PMC7293189; doi:10.7717/peerj.9163), 2020-06-10
Supplement: peerj-08-9163-s003.pdf [file peerj-08-9163-s003.pdf]

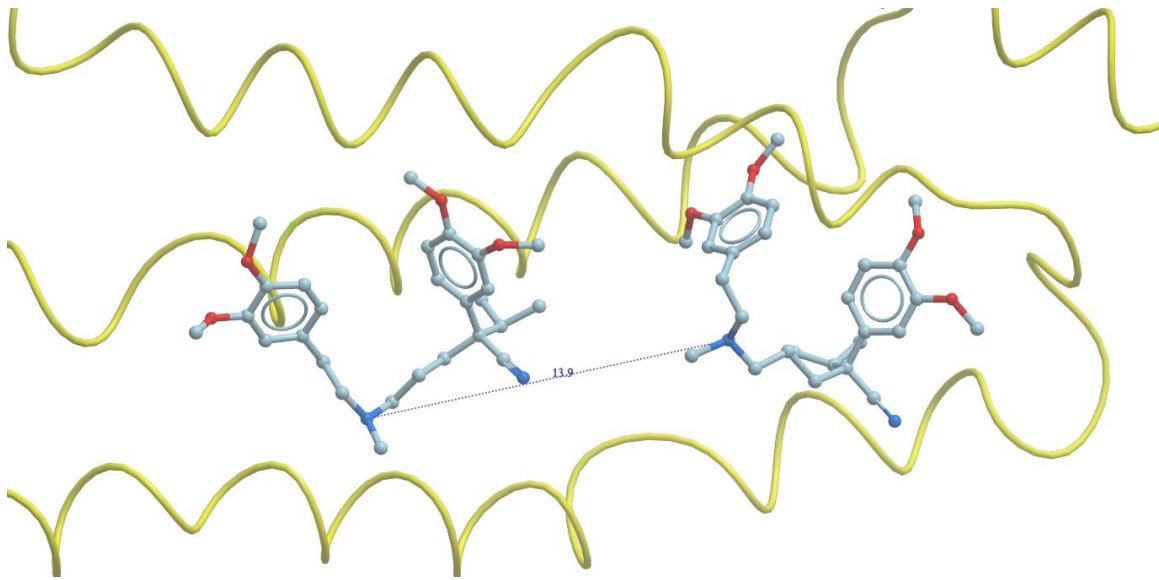

**Supplementary Fig. 3 Movement of verapamil through P-glycoprotein.**
