# Supplementary material for: In silico and in vitro identification of secoisolariciresinol as a re-sensitizer of P-glycoprotein-dependent doxorubicin-resistance NCI/ADR-RES cancer cells
Source: PeerJ journal article supplement (doi:10.7717/peerj.9163), 2020-06-10
Supplement: Suppl_Fig._1.pdf [file Suppl_Fig._1.pdf]

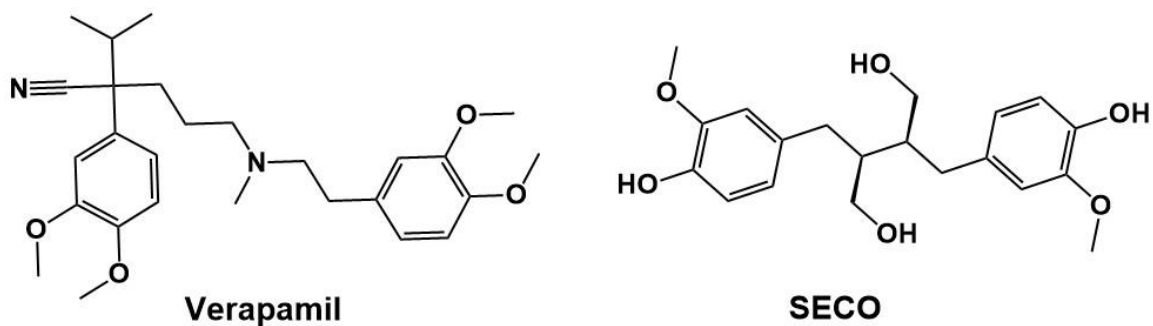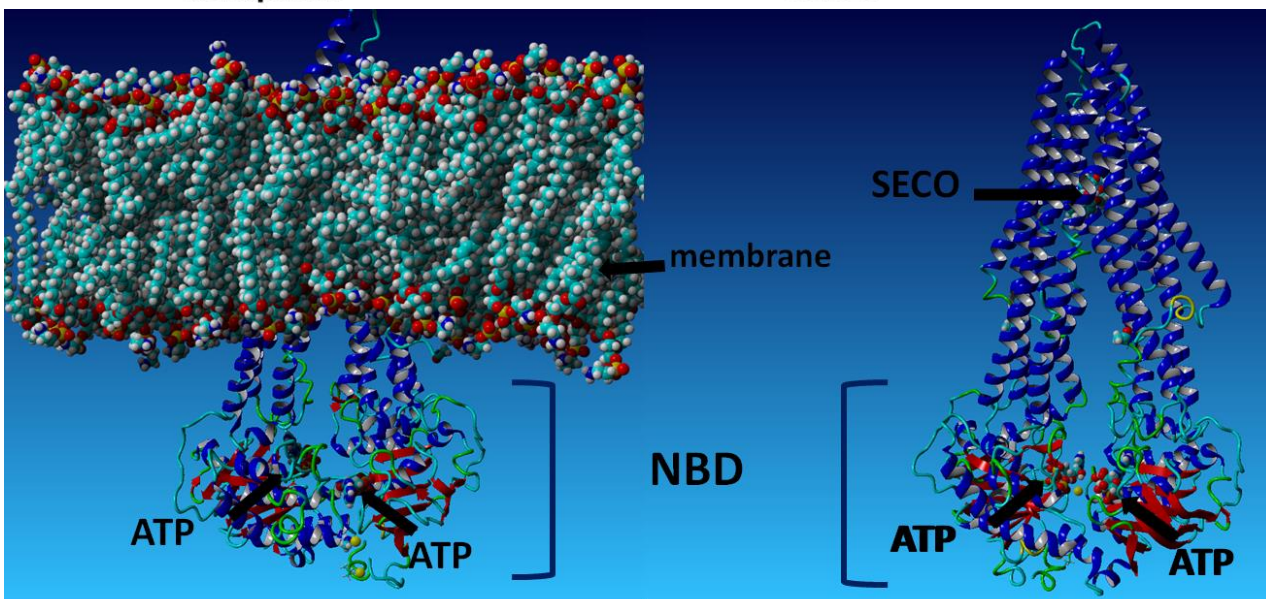

**Supplementary Fig. 1** The chemical structures of secoisolariciresinol (SECO) and verapamil as well as the position of docked SECO (or verapamil) into the substrate-binding site of P-glycoprotein. The whole structure was placed in equilibrated membrane patch and used in molecular dynamics experiment.
