# Supplementary material for: In silico and in vitro identification of secoisolariciresinol as a re-sensitizer of P-glycoprotein-dependent doxorubicin-resistance NCI/ADR-RES cancer cells
Source: PeerJ journal article supplement (doi:10.7717/peerj.9163), 2020-06-10
Supplement: Suppl_Fig._4.pdf [file Suppl_Fig._4.pdf]

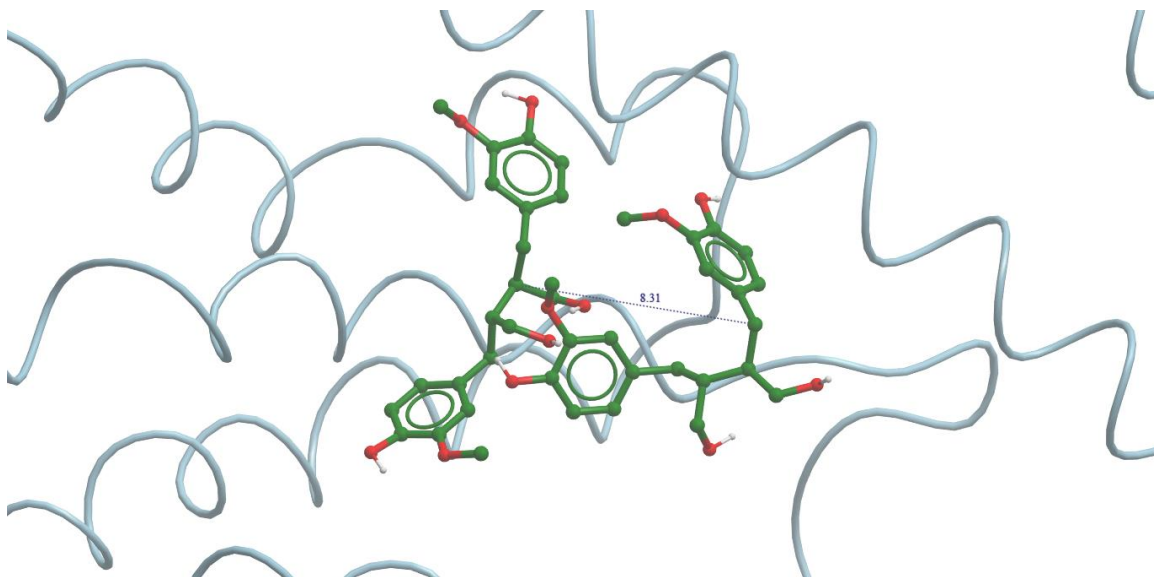

**Supplementary Fig. 4. Movement of secoisolariciresinol through P-glycoprotein.**
