# Supplementary material for: In silico and in vitro identification of secoisolariciresinol as a re-sensitizer of P-glycoprotein-dependent doxorubicin-resistance NCI/ADR-RES cancer cells
Source: PeerJ. 2020 Jun 10;8:e9163. doi: 10.7717/peerj.9163 (PMC7293189; doi:10.7717/peerj.9163)
Supplement: Supplemental Information 2 [file peerj-08-9163-s002.pdf]

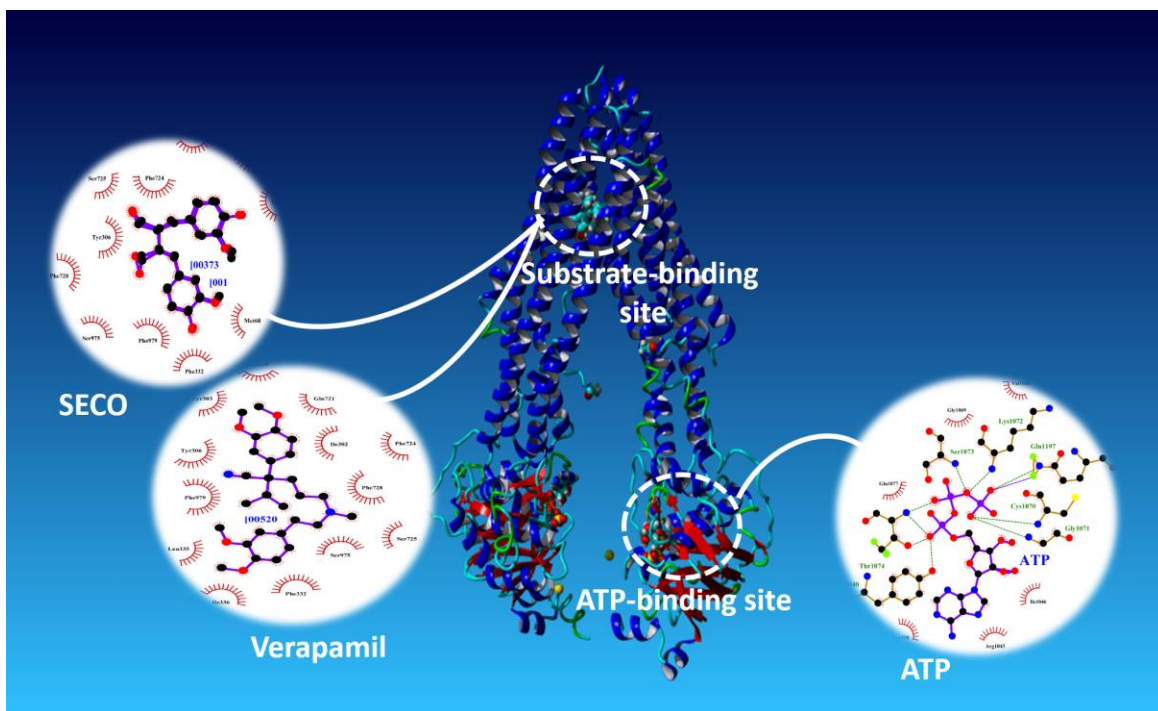

**Supplementary Fig. 2. The sites and docking interactions of secoisolariciresinol (SECO) and verapamil with P-glycoprotein.**
