# Supplementary material for: In silico and in vitro identification of secoisolariciresinol as a re-sensitizer of P-glycoprotein-dependent doxorubicin-resistance NCI/ADR-RES cancer cells
Source: PeerJ. 2020 Jun 10;8:e9163. doi: 10.7717/peerj.9163 (PMC7293189; doi:10.7717/peerj.9163)
Supplement: Supplemental Information 5 [file peerj-08-9163-s005.xlsx]

## Sheet: Sheet1
Control	Verapamil 10 μM	SECO 1μM	SECO 5μM	SECO 10μM	SECO 25μM	SECO 50μM
100	143.002	88.9535	88.9327	93.3762	98.3596	100.955
100	141.793	94.301	104.482	101.494	107.15	109.712
100	124.492	98.6516	104.664	104.244	107.67	112.953
100	113.197	103.333	107.256	108.662	118.571	113.9
100	147.638	114.545	119.244	125.584	130.482	134.659
100	131.001	108.375	111.668	112.53	114.618	119.074
100	165.379	120.715	132.134	129.454	143.771	137.349
100	122.731	116.055	129.549	123.93	132.652	128.796

## Sheet: Sheet2
Control	Verapamil 10 μM	SECO 1 μM	SECO 5 μM	SECO 10 μM	SECO 25 μM	SECO 50 μM	DOX 1 μM	DOX 1 μM+Verapamil 10 μM	DOX 1 μM+SECO 1 μM	DOX 1 μM+SECO 5 μM	DOX 1 μM+SECO 10 μM	DOX 1 μM+SECO 25 μM	DOX 1 μM+SECO 50 μM
1.963	2.17	2.079	2.095	1.95	1.92	1.913	1.32	1.037	1.287	1.301	1.267	1.234	1.242
1.95	2.216	2.119	2.02	2	2.017	1.926	1.321	1.063	1.314	1.314	1.281	1.303	1.252
1.976	2.169	2.06	1.986	2.018	1.945	1.916	1.338	1.078	1.3	1.321	1.324	1.133	1.152
2.158	2.171	2.037	1.97	2.021	1.87	1.748	1.402	1.069	1.363	1.301	1.277	1.296	1.21
2.235	2.175	2.09	1.996	1.986	1.891	1.667		1.052	1.333	1.313	1.342	1.259	1.266
2.343	2.252	2.063	2.019	2.034	1.886	1.891		1.056	1.339	1.301	1.316	1.334	1.112
	2.14	2.112	2.058	2.063	1.991	1.917		1.119	1.31	1.287	1.289	1.324	1.284
									1.375	1.175	1.303	1.19	1.12
